# Supplementary material for: The pathogenicity of vancomycin-resistant Enterococcus faecalis to colon cancer cells
Source: Springer Nature journal article supplement (doi:10.1186/s12879-024-09133-2), 2024-02-20
Supplement: MOESM1 [file 26754760]

## Supplementary Figure S1

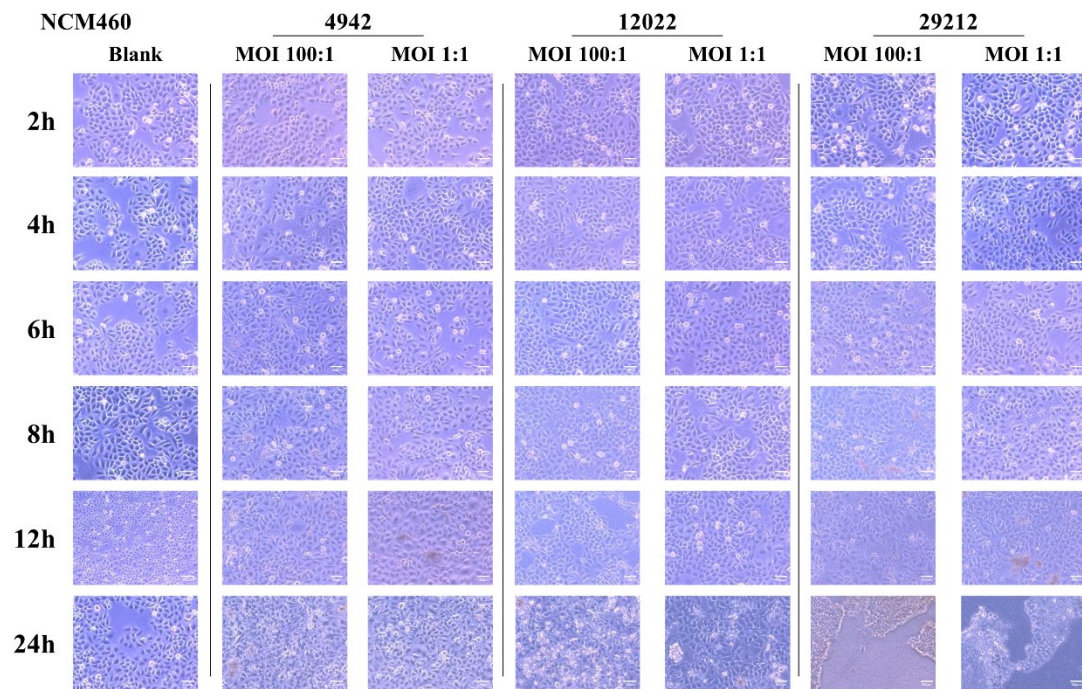

Supplementary Figure S1. Morphological changes of NCM460 infected with different *Enterococcus faecalis* (VREs: 4942, 12022 and ATCC 29212). Scale bar, 100 $\mu$ m.
